# Supplementary material
Source: HighWire-hosted journal article supplement (https://cmaj.ca/highwire/filestream/58313/field_highwire_adjunct_files/0/poise-dev-1-at.pdf)
Supplement: poise-dev-1-at.pdf [file poise-dev-1-at.pdf]

## **APPENDIX 1 (as supplied by the authors)**

### **The following persons participated in the POISE Trial:**

**Operations Committee:** P.J. Devereaux (Co-Principal Investigator), H. Yang (Co-Principal Investigator), S. Yusuf (Chair of Steering Committee), G. Guyatt (Event Adjudication Chair).

**Canadian Members of Steering Committee:** P.J. Devereaux, H. Yang, S. Yusuf, G. Guyatt, S. Chrolavicius (Project Manager), J. Pogue (Study Statistician), L. Greenspan, M. Jacka, P. Choi.

**Canadian Members of the Events Adjudication Committee:** G. Guyatt, D. Chauret, K. Gilbert, R.J. Hudson, L. Lanthier, A. Panju.

**Population Health Research Institute (PHRI) Project Office:** L. Gallacher, L. Greenspan (Coordinator), M. Lawrence (Events Adjudication Coordinator), A. Mead, T. Rodrigues;

**Canadian Members of the External Safety and Efficacy and Monitoring Committee:** G. Dagenais (Chair), D. Cheng, R.S. Roberts.

**Canadian Investigators Who Enrolled Participants (3548):** R. Aggarwala, E. Argibay-Poliquin, N. Badner, C. Baer, W.S. Beattie, M. Bednarowski, H.A. Bertozzi, G. Boisvenu, A. Boulton, D. Brunet, G.L. Bryson, J. Burlingham, J. Campeau, D. Chauret, P. Choi, D. Cook, D.R. Cook, P. Cossette, M. Crossan, B. Davies, P.J. Devereaux, J. DeWolfe, G. Doig, P. Duffy, M.S. Eng, S. Finlay, A. Finlayson, J. Gallacher, W. Ghali, K. Gilbert, D. Hughes, L. Hunter, M.J. Jacka, C. Kamra, M. Khurana, C. Kinsella, L. Lanthier, T.W.R. Lee, M. Lovell, C. MacDonald, P. MacDonald, M. Marquis, J. Marti, R. Martinek, R.N. Merchant, J. Misterski, R. Mizera, R. Moor, J. Morin, M. O'Reilly, J. Ostrander, J.L. Parlow, J. Paul, S. Pettit, D. Pilon, G. Pruneau, S. Rammohan, T. Schricker, S. Sivakumaran, L. Sonnema, S. Stoger, C. Thompson, D. Tod, S. Toner, M. Turabian, D. Twist, C. Urbanowicz, J.M. van Vlymen, B. Warriner, D.N. Wijeyesundera, D.T. Wong, H. Yang, K. Zarnke
